# Supplementary material for: Mitochondrial dysfunction-induced KDM5A degradation impairs adult hippocampal neurogenesis in Alzheimer’s disease
Source: Research Square preprint supplement (doi:10.21203/rs.3.rs-114597/v1), 2020-12-01
Supplement: Supplementary file 1 [file e6f87e829c50ccdd30dc8546.xlsx]

## Sheet: diff_onto
Table S4. GO Analysis of KDM5A-Binding Genes in Differentiated Cells
source	term_name	term_id	adjusted_p_value	negative_log10_of_adjusted_p_value	term_size	query_size	intersection_size	effective_domain_size	intersections
GO:MF	protein binding	GO:0005515	0.00196863	2.70583	11632	589	441	17516	SENP5,RFK,TNKS,RAE1,NME8,ACSL3,ANK3,KLF15,RAB11FIP2,RTF1,PASD1,CNNM4,MT2A,ATIC,ANKRD28,MAP3K10,GLRX3,PLXDC2,SETD3,PAXBP1,GSTA4,C12ORF40,TEAD1,ATXN2L,TNFAIP8,UBXN11,BRD4,AP3B1,WDR27,CRB1,DCP2,UNC45B,SCUBE3,PPP1R15B,SUZ12,WWOX,FIP1L1,LDB1,RFX3,KRT8,PHKB,TMSB4X,KCND3,MNS1,FOXP1,BBS9,EFHC2,GLDC,RPLP1,NGB,DNA2,TMEM242,KLHL15,RPS4X,AKIRIN2,SPTBN4,TMSB10,YAP1,TBC1D19,LDHAL6B,RNF217,RNF14,CHMP6,TRIM71,TA…
GO:MF	enzyme binding	GO:0019899	0.0120696	1.91831	2266	589	111	17516	ACSL3,RAB11FIP2,RTF1,GLRX3,BRD4,AP3B1,WWOX,LDB1,TMSB4X,GLDC,AKIRIN2,SPTBN4,RNF217,RNF14,TAF7L,TBC1D16,DUSP22,PPP3CB,RPS6,CNTLN,CDC27,MEF2A,RIN2,GSG1,CYTH1,TUBB,PACRG,ACTG1,ARHGEF3,SLC12A2,VHL,RIC1,FLNA,CCND3,MDM4,TRIOBP,PPEF2,CYFIP1,DLG2,ELP4,CHEK2,MAST2,NR3C1,ARHGEF18,CUL3,SRSF5,DMD,IQSEC1,ZBTB7A,STX8,DNAJC3,CTNNB1,ACTB,ARHGEF4,SRC,PRKAR2A,TAX1BP1,DOCK9,ANK2,NFATC2,ERC1,PTN,MOB1B,DOCK10,GCN1,HSP…
GO:MF	binding	GO:0005488	0.0189708	1.72191	15096	589	539	17516	SENP5,RFK,TNKS,RAE1,NME8,ACSL3,ANK3,GMPR,KLF15,RAB11FIP2,RTF1,PASD1,CNNM4,MT2A,GDE1,ATIC,ANKRD28,GRIA3,MAP3K10,GLRX3,PLXDC2,SETD3,PAXBP1,GSTA4,C12ORF40,RPS29,TEAD1,ATXN2L,TNFAIP8,UBXN11,BRD4,AP3B1,WDR27,CRB1,DCP2,LOXHD1,GALNT17,UNC45B,HMGN1,SULF1,SCML1,SCUBE3,PPP1R15B,SUZ12,WWOX,FIP1L1,LDB1,RFX3,KRT8,PHKB,ADAMTS9,TMSB4X,KCND3,ARSG,MNS1,FOXP1,BBS9,EFHC2,GLDC,RPLP1,NGB,DNA2,TMEM242,KLHL15,RPS4X,AKI…
GO:MF	structural constituent of ribosome	GO:0003735	0.0279237	1.55403	168	589	17	17516	RPS29,RPLP1,RPS4X,RPL32,RPL26L1,RPS6,MRPS12,RPL34,RPS28,RPS24,RPL37A,RPS16,RPL19,RPS17,MRPL49,RPL14,RPS23
GO:BP	cellular component morphogenesis	GO:0032989	5.43e-08	7.26493	1100	595	81	17622	ANK3,KRT8,FOXP1,SPTBN4,YAP1,BDNF,NRXN3,PPP3CB,EPHA7,MEF2A,COL23A1,S100A6,LINGO1,BRWD1,COL6A1,ACTG1,CHN1,VHL,FLNA,TRIOBP,CYFIP1,SGK1,QRICH1,POU3F2,DOK6,ARHGEF18,CUL3,PRKCQ,PHLDB2,EXT1,DMD,PID1,WNT7A,CTNNB1,IMPACT,SRC,SLC1A3,ANK2,WDR19,PTN,PARVG,ICAM1,DOCK10,CFL1,EPB41L3,POU4F2,ANXA1,BRAF,NRP1,PTPRS,ROBO2,MYH11,CARMIL1,CDKL5,PAX6,DLC1,AR,SMO,ATOH1,COL6A3,FRYL,SYT17,ARHGAP35,ZNF365,CAPZB,GFRA4,DAPK3…
GO:BP	cell morphogenesis	GO:0000902	1.48e-07	6.83109	1001	595	75	17622	ANK3,FOXP1,SPTBN4,YAP1,BDNF,NRXN3,PPP3CB,EPHA7,MEF2A,COL23A1,S100A6,LINGO1,BRWD1,COL6A1,CHN1,VHL,FLNA,TRIOBP,CYFIP1,SGK1,QRICH1,POU3F2,DOK6,ARHGEF18,CUL3,PRKCQ,EXT1,DMD,WNT7A,CTNNB1,IMPACT,SRC,SLC1A3,WDR19,PTN,PARVG,ICAM1,DOCK10,CFL1,EPB41L3,POU4F2,ANXA1,BRAF,NRP1,PTPRS,ROBO2,CARMIL1,CDKL5,PAX6,DLC1,AR,SMO,ATOH1,COL6A3,FRYL,SYT17,ARHGAP35,ZNF365,CAPZB,GFRA4,DAPK3,SEMA4D,EPB41L5,WDPCP,RBFOX2,C8ORF…
GO:BP	cellular component organization or biogenesis	GO:0071840	6.76e-07	6.17033	6417	595	290	17622	TNKS,RAE1,NME8,ACSL3,ANK3,RTF1,ANKRD28,GLRX3,SETD3,PAXBP1,TEAD1,ATXN2L,BRD4,AP3B1,CRB1,DCP2,HMGN1,SULF1,SCUBE3,SUZ12,LDB1,RFX3,KRT8,ADAMTS9,TMSB4X,KCND3,MNS1,FOXP1,BBS9,DNA2,SPTBN4,TMSB10,YAP1,PARP11,CHMP6,TAF7L,BDNF,CHCHD2,DNAH9,PLEKHA7,NRXN3,RPL26L1,DUSP22,PPP3CB,RPS6,CNTLN,TLE2,EPHA7,FUNDC2,ATP11C,CDC27,MEF2A,PDE3A,NFU1,ADAM12,COL23A1,CTNNBIP1,S100A6,LINGO1,BRWD1,AFF2,TENM3,DST,TUBB,COL6A1,USP…
GO:BP	anatomical structure morphogenesis	GO:0009653	1.33e-06	5.87637	2631	595	145	17622	ANK3,RTF1,CNNM4,CRB1,HMGN1,SULF1,SCML1,WWOX,LDB1,KRT8,ADAMTS9,FOXP1,SPTBN4,YAP1,TRIM71,BDNF,NRXN3,PPP3CB,RPS6,TLE2,EPHA7,MEF2A,ADAM12,COL23A1,IL7,CTNNBIP1,S100A6,LINGO1,BRWD1,TENM3,COL6A1,ACTG1,NOX5,CHN1,APAF1,VHL,ITGA2,FLNA,CD53,MEGF11,SCML2,TRIOBP,CYFIP1,SGK1,ARL6,QRICH1,POU3F2,SDK1,DOK6,ECE1,SCGB3A1,ARHGEF18,CUL3,DYRK1B,TBX1,PRKCQ,PHLDB2,EXT1,DMD,PID1,WNT7A,NRARP,CTNNB1,IMPACT,SRC,SLC1A3,ANK2,…
GO:BP	cellular component organization	GO:0016043	2.97e-06	5.5275	6243	595	281	17622	TNKS,RAE1,NME8,ACSL3,ANK3,RTF1,ANKRD28,GLRX3,SETD3,PAXBP1,TEAD1,ATXN2L,BRD4,AP3B1,CRB1,DCP2,HMGN1,SULF1,SCUBE3,SUZ12,LDB1,RFX3,KRT8,ADAMTS9,TMSB4X,KCND3,MNS1,FOXP1,BBS9,DNA2,SPTBN4,TMSB10,YAP1,PARP11,CHMP6,TAF7L,BDNF,CHCHD2,DNAH9,PLEKHA7,NRXN3,DUSP22,PPP3CB,CNTLN,TLE2,EPHA7,FUNDC2,ATP11C,CDC27,MEF2A,PDE3A,NFU1,ADAM12,COL23A1,CTNNBIP1,S100A6,LINGO1,BRWD1,AFF2,TENM3,DST,TUBB,COL6A1,USP44,IMMP2L,RHO…
GO:BP	cell morphogenesis involved in differentiation	GO:0000904	6.73e-06	5.17225	726	595	57	17622	ANK3,FOXP1,SPTBN4,BDNF,NRXN3,PPP3CB,EPHA7,MEF2A,COL23A1,S100A6,LINGO1,COL6A1,CHN1,FLNA,TRIOBP,CYFIP1,POU3F2,DOK6,CUL3,PRKCQ,EXT1,WNT7A,CTNNB1,SRC,SLC1A3,PARVG,DOCK10,CFL1,POU4F2,BRAF,NRP1,PTPRS,ROBO2,CARMIL1,CDKL5,PAX6,AR,SMO,ATOH1,COL6A3,ARHGAP35,ZNF365,GFRA4,SEMA4D,EPB41L5,WDPCP,RBFOX2,C8ORF37,PCDH15,POF1B,BRSK2,EPHA4,APBB2,FRMD6,GAB2,LAMB1,CTTN
GO:BP	neuron development	GO:0048666	1.32e-05	4.8807	1085	595	74	17622	ANK3,CRB1,FOXP1,SPTBN4,BDNF,NRXN3,PPP3CB,EPHA7,MEF2A,S100A6,LINGO1,OPCML,TENM3,EZH2,CHN1,TRIOBP,ABL2,CYFIP1,SGK1,POU3F2,SDK1,DOK6,B2M,CDNF,CNR1,PRKCQ,EXT1,DMD,SPOCK1,WNT7A,CTNNB1,IMPACT,SRC,SLC1A3,PTN,DOCK10,HSPA5,CFL1,EPB41L3,CHODL,POU4F2,BRAF,ULK4,NRP1,PTPRS,ROBO2,CDKL5,PAX6,SMO,ATOH1,FRYL,SYT17,ARHGAP35,CRTC1,NEGR1,GRXCR1,ZNF365,GFRA4,CNTN1,SEMA4D,WDPCP,OLFM3,RBFOX2,C8ORF37,PCDH15,SERPINF1,BRS…
GO:BP	cell projection organization	GO:0030030	4.15e-05	4.38196	1510	595	92	17622	NME8,ANK3,RFX3,MNS1,FOXP1,BBS9,SPTBN4,BDNF,DNAH9,NRXN3,PPP3CB,EPHA7,MEF2A,S100A6,LINGO1,TENM3,TUBB,EZH2,CHN1,ITGA2,FOPNL,FLNA,TRIOBP,ABL2,CYFIP1,SGK1,ARL6,TTBK2,POU3F2,SDK1,DOK6,B2M,CUL3,CDNF,NEK1,CNR1,PRKCQ,EXT1,DMD,SPOCK1,WNT7A,CTNNB1,IQCG,IMPACT,ARHGEF4,SRC,WDR19,PTN,PARVG,ICAM1,DOCK10,HSPA5,CFL1,PKN2,EPB41L3,CHODL,POU4F2,BRAF,ULK4,NRP1,PTPRS,ROBO2,CARMIL1,CDKL5,PAX6,SMO,PDGFA,ATOH1,FRYL,SYT17…
GO:BP	neuron projection development	GO:0031175	6.32e-05	4.19958	957	595	66	17622	ANK3,FOXP1,SPTBN4,BDNF,NRXN3,PPP3CB,EPHA7,MEF2A,S100A6,LINGO1,TENM3,EZH2,CHN1,TRIOBP,ABL2,CYFIP1,SGK1,POU3F2,SDK1,DOK6,B2M,CDNF,CNR1,PRKCQ,EXT1,DMD,SPOCK1,WNT7A,CTNNB1,IMPACT,SRC,PTN,DOCK10,HSPA5,CFL1,EPB41L3,CHODL,POU4F2,BRAF,ULK4,NRP1,PTPRS,ROBO2,CDKL5,PAX6,SMO,ATOH1,FRYL,SYT17,ARHGAP35,CRTC1,NEGR1,GRXCR1,ZNF365,GFRA4,CNTN1,SEMA4D,RBFOX2,PCDH15,SERPINF1,BRSK2,EPHA4,APBB2,GAB2,LAMB1,CTTN
GO:BP	cell development	GO:0048468	7.57e-05	4.12071	2111	595	117	17622	ANK3,CRB1,SULF1,RFX3,KRT8,FOXP1,SPTBN4,YAP1,BDNF,NRXN3,PPP3CB,RPS6,EPHA7,MEF2A,PDE3A,COL23A1,S100A6,LINGO1,OPCML,TENM3,COL6A1,PACRG,EZH2,ACTG1,CHN1,FLNA,PIP4K2A,TRIOBP,ABL2,CYFIP1,SGK1,POU3F2,SDK1,DOK6,B2M,CUL3,CDNF,TBX1,CNR1,PRKCQ,EXT1,DMD,SPOCK1,ZBTB7A,WNT7A,CTNNB1,IQCG,IMPACT,SRC,SLC1A3,FMN2,ANK2,NFATC2,PTN,CHD7,PARVG,ZNF536,ICAM1,DOCK10,HSPA5,CFL1,EPB41L3,CHODL,POU4F2,BRAF,ULK4,NRP1,PTPRS,DIA…
GO:BP	nervous system development	GO:0007399	0.00030417	3.51688	2311	595	123	17622	ACSL3,ANK3,KLF15,ATIC,CRB1,SULF1,LDB1,FOXP1,SPTBN4,YAP1,TRIM71,BDNF,NRXN3,PPP3CB,EPHA7,MEF2A,S100A6,LINGO1,AFF2,OPCML,TENM3,MACO1,IMMP2L,EZH2,CHN1,APAF1,FLNA,TRIOBP,ABL2,CYFIP1,SGK1,TENT2,ARL6,TTBK2,POU3F2,SDK1,DOK6,B2M,CDNF,TBX1,CNR1,PRKCQ,EXT1,DMD,SPOCK1,WNT7A,CTNNB1,ACTB,IMPACT,SRC,SLC1A3,ANK2,WDR19,PTN,CHD7,ZNF536,ARHGAP11B,DOCK10,HSPA5,CFL1,EPB41L3,CHODL,POU4F2,ANXA1,BRAF,ULK4,NRP1,PTPRS,MPP…
GO:BP	nuclear-transcribed mRNA catabolic process, nonsense-mediated decay	GO:0000184	0.000359182	3.44469	122	595	18	17622	RPS29,DCP2,RPLP1,RPS4X,RPL32,RPS6,RPL34,RPS28,RPS24,RPL37A,RPS16,RPL19,PPP2CA,RPS17,RPL14,RPS23,PARN,DCP1B
GO:BP	neuron differentiation	GO:0030182	0.000432043	3.36447	1337	595	81	17622	ANK3,CRB1,LDB1,FOXP1,SPTBN4,BDNF,NRXN3,PPP3CB,EPHA7,MEF2A,S100A6,LINGO1,OPCML,TENM3,EZH2,CHN1,TRIOBP,ABL2,CYFIP1,SGK1,TENT2,POU3F2,SDK1,DOK6,B2M,CDNF,CNR1,PRKCQ,EXT1,DMD,SPOCK1,WNT7A,CTNNB1,IMPACT,SRC,SLC1A3,PTN,ZNF536,DOCK10,HSPA5,CFL1,EPB41L3,CHODL,POU4F2,BRAF,ULK4,NRP1,PTPRS,ROBO2,CDKL5,PAX6,TLX3,SMO,ATOH1,FRYL,SYT17,ARHGAP35,CRTC1,NEGR1,GRXCR1,ZNF365,GFRA4,DAPK3,CNTN1,RORA,SEMA4D,VEGFD,WDPCP,…
GO:BP	generation of neurons	GO:0048699	0.000582133	3.23498	1483	595	87	17622	ANK3,CRB1,LDB1,FOXP1,SPTBN4,YAP1,BDNF,NRXN3,PPP3CB,EPHA7,MEF2A,S100A6,LINGO1,OPCML,TENM3,EZH2,CHN1,FLNA,TRIOBP,ABL2,CYFIP1,SGK1,TENT2,POU3F2,SDK1,DOK6,B2M,CDNF,CNR1,PRKCQ,EXT1,DMD,SPOCK1,WNT7A,CTNNB1,IMPACT,SRC,SLC1A3,PTN,CHD7,ZNF536,DOCK10,HSPA5,CFL1,EPB41L3,CHODL,POU4F2,BRAF,ULK4,NRP1,PTPRS,ROBO2,SOX5,CDKL5,PAX6,TLX3,SMO,ATOH1,FRYL,DRD3,SYT17,ARHGAP35,CRTC1,NEGR1,GRXCR1,ZNF365,GFRA4,DAPK3,CNTN1…
GO:BP	actin cytoskeleton organization	GO:0030036	0.000708037	3.14994	647	595	48	17622	KRT8,TMSB4X,FOXP1,SPTBN4,TMSB10,MEF2A,SWAP70,ACTG1,FRMD3,FLNA,MICAL3,TRIOBP,ABL2,CYFIP1,ARHGEF18,CUL3,PHLDB2,IQSEC1,ACTB,SRC,FCHSD2,FMN2,PARVG,ICAM1,CFL1,EPB41L3,ANXA1,BRAF,NRP1,DIAPH2,MYH11,CARMIL1,DLC1,PDGFA,ARHGAP35,CAPZB,DAPK3,EPB41L5,SLC9A1,PCDH15,SORBS2,POF1B,RFLNB,BRSK2,FSCN2,FRMD6,KIF23,CTTN
GO:BP	plasma membrane bounded cell projection organization	GO:0120036	0.000872505	3.05923	1474	595	86	17622	NME8,ANK3,RFX3,MNS1,FOXP1,BBS9,SPTBN4,BDNF,NRXN3,PPP3CB,EPHA7,MEF2A,S100A6,LINGO1,TENM3,TUBB,EZH2,CHN1,FOPNL,FLNA,TRIOBP,ABL2,CYFIP1,SGK1,ARL6,TTBK2,POU3F2,SDK1,DOK6,B2M,CDNF,NEK1,CNR1,PRKCQ,EXT1,DMD,SPOCK1,WNT7A,CTNNB1,IQCG,IMPACT,ARHGEF4,SRC,WDR19,PTN,ICAM1,DOCK10,HSPA5,CFL1,EPB41L3,CHODL,POU4F2,BRAF,ULK4,NRP1,PTPRS,ROBO2,CARMIL1,CDKL5,PAX6,SMO,ATOH1,FRYL,SYT17,ARHGAP35,CRTC1,NEGR1,GRXCR1,ZNF36…
GO:BP	cell morphogenesis involved in neuron differentiation	GO:0048667	0.000881983	3.05454	573	595	44	17622	ANK3,FOXP1,SPTBN4,BDNF,NRXN3,PPP3CB,EPHA7,MEF2A,S100A6,LINGO1,CHN1,TRIOBP,CYFIP1,POU3F2,DOK6,PRKCQ,EXT1,WNT7A,SRC,SLC1A3,DOCK10,CFL1,POU4F2,BRAF,NRP1,PTPRS,ROBO2,CDKL5,PAX6,SMO,ATOH1,ARHGAP35,ZNF365,GFRA4,SEMA4D,WDPCP,RBFOX2,C8ORF37,PCDH15,BRSK2,EPHA4,APBB2,GAB2,CTTN
GO:BP	neurogenesis	GO:0022008	0.0011757	2.9297	1577	595	90	17622	ANK3,KLF15,CRB1,LDB1,FOXP1,SPTBN4,YAP1,BDNF,NRXN3,PPP3CB,EPHA7,MEF2A,S100A6,LINGO1,OPCML,TENM3,EZH2,CHN1,FLNA,TRIOBP,ABL2,CYFIP1,SGK1,TENT2,POU3F2,SDK1,DOK6,B2M,CDNF,CNR1,PRKCQ,EXT1,DMD,SPOCK1,WNT7A,CTNNB1,IMPACT,SRC,SLC1A3,PTN,CHD7,ZNF536,DOCK10,HSPA5,CFL1,EPB41L3,CHODL,POU4F2,ANXA1,BRAF,ULK4,NRP1,PTPRS,ROBO2,SOX5,CDKL5,PAX6,TLX3,SMO,ATOH1,FRYL,DRD3,SYT17,ARHGAP35,CRTC1,NEGR1,GRXCR1,ZNF365,GFRA4…
GO:BP	actin filament-based process	GO:0030029	0.00124971	2.90319	741	595	52	17622	KRT8,TMSB4X,KCND3,FOXP1,SPTBN4,TMSB10,MEF2A,SWAP70,ACTG1,FRMD3,FLNA,MICAL3,TRIOBP,ABL2,CYFIP1,ARHGEF18,CUL3,PHLDB2,DMD,IQSEC1,ACTB,SRC,FCHSD2,FMN2,ANK2,PARVG,ICAM1,CFL1,EPB41L3,ANXA1,BRAF,NRP1,DIAPH2,MYH11,CARMIL1,DLC1,PDGFA,ARHGAP35,KCNQ1,CAPZB,DAPK3,EPB41L5,SLC9A1,PCDH15,SORBS2,POF1B,RFLNB,BRSK2,FSCN2,FRMD6,KIF23,CTTN
GO:BP	cell junction organization	GO:0034330	0.00170554	2.76814	291	595	28	17622	LDB1,PLEKHA7,DUSP22,DST,ACTG1,ITGA2,FLNA,SDK1,PHLDB2,IQSEC1,CTNNB1,ACTB,SRC,ANK2,PKN2,EPB41L3,NRP1,TLN2,DLC1,ACE,DAPK3,EPB41L5,PATJ,WDPCP,SLC9A1,POF1B,CADM2,CTTN
GO:BP	SRP-dependent cotranslational protein targeting to membrane	GO:0006614	0.00184977	2.73288	96	595	15	17622	RPS29,RPLP1,RPS4X,RPL32,RPS6,RPL34,RPS28,RPS24,RPL37A,RPS16,RPL19,RPS17,SRP14,RPL14,RPS23
GO:BP	cotranslational protein targeting to membrane	GO:0006613	0.00360077	2.4436	101	595	15	17622	RPS29,RPLP1,RPS4X,RPL32,RPS6,RPL34,RPS28,RPS24,RPL37A,RPS16,RPL19,RPS17,SRP14,RPL14,RPS23
GO:BP	cell junction assembly	GO:0034329	0.00502956	2.29847	239	595	24	17622	LDB1,DUSP22,DST,ACTG1,ITGA2,FLNA,PHLDB2,CTNNB1,ACTB,SRC,ANK2,PKN2,EPB41L3,NRP1,TLN2,DLC1,ACE,DAPK3,EPB41L5,PATJ,WDPCP,SLC9A1,POF1B,CTTN
GO:BP	developmental process	GO:0032502	0.00639071	2.19445	6205	595	263	17622	NME8,ACSL3,ANK3,KLF15,RTF1,CNNM4,ATIC,CNFN,SETD3,PAXBP1,AP3B1,CRB1,UNC45B,HMGN1,SULF1,SCML1,MAMLD1,SUZ12,WWOX,LDB1,RFX3,KRT8,ADAMTS9,MNS1,FOXP1,BBS9,RPS4X,AKIRIN2,SPTBN4,YAP1,PARP11,RNF114,LARGE1,TRIM71,TAF7L,BDNF,ZFAT,NRXN3,DUSP22,KRTAP4-9,PPP3CB,RPS6,TLE2,EPHA7,ATP11C,MEF2A,PDE3A,ADAM12,COL23A1,RNF38,IL7,CTNNBIP1,S100A6,LINGO1,BRWD1,AFF2,OPCML,TENM3,MACO1,COL6A1,IMMP2L,PACRG,EZH2,MAX,SWAP70,ACT…
GO:BP	neuron projection morphogenesis	GO:0048812	0.00660153	2.18036	638	595	45	17622	ANK3,FOXP1,SPTBN4,BDNF,NRXN3,PPP3CB,EPHA7,MEF2A,S100A6,LINGO1,CHN1,CYFIP1,SGK1,POU3F2,DOK6,PRKCQ,EXT1,DMD,WNT7A,CTNNB1,IMPACT,SRC,DOCK10,CFL1,EPB41L3,POU4F2,BRAF,NRP1,PTPRS,ROBO2,CDKL5,PAX6,SMO,ATOH1,SYT17,ARHGAP35,ZNF365,GFRA4,SEMA4D,RBFOX2,BRSK2,EPHA4,APBB2,GAB2,CTTN
GO:BP	anatomical structure development	GO:0048856	0.00661351	2.17957	5813	595	249	17622	NME8,ACSL3,ANK3,KLF15,RTF1,CNNM4,ATIC,CNFN,SETD3,PAXBP1,AP3B1,CRB1,UNC45B,HMGN1,SULF1,SCML1,MAMLD1,WWOX,LDB1,RFX3,KRT8,ADAMTS9,MNS1,FOXP1,RPS4X,AKIRIN2,SPTBN4,YAP1,RNF114,LARGE1,TRIM71,TAF7L,BDNF,ZFAT,NRXN3,DUSP22,KRTAP4-9,PPP3CB,RPS6,TLE2,EPHA7,ATP11C,MEF2A,PDE3A,ADAM12,COL23A1,RNF38,IL7,CTNNBIP1,S100A6,LINGO1,BRWD1,AFF2,OPCML,TENM3,MACO1,COL6A1,IMMP2L,PACRG,EZH2,MAX,SWAP70,ACTG1,TESMIN,NOX5,CHN…
GO:BP	regulation of neuron projection development	GO:0010975	0.00773748	2.1114	482	595	37	17622	BDNF,EPHA7,LINGO1,TENM3,EZH2,CHN1,ABL2,CYFIP1,POU3F2,SDK1,B2M,CNR1,DMD,SPOCK1,WNT7A,PTN,HSPA5,CFL1,CHODL,POU4F2,BRAF,ULK4,NRP1,PTPRS,ROBO2,CDKL5,SYT17,ARHGAP35,CRTC1,NEGR1,ZNF365,CNTN1,SEMA4D,SERPINF1,BRSK2,EPHA4,CTTN
GO:BP	hindbrain development	GO:0030902	0.00795862	2.09916	150	595	18	17622	ATIC,LDB1,EZH2,FLNA,TTBK2,WNT7A,CTNNB1,PTN,HSPA5,PTPRS,SEZ6L,DLC1,SMO,ZNF365,FOXC1,CNTN1,RORA,RBFOX2
GO:BP	protein localization to endoplasmic reticulum	GO:0070972	0.0084914	2.07102	136	595	17	17622	RPS29,RPLP1,RPS4X,RPL32,RPS6,RPL34,RPS28,RPS24,ANK2,RPL37A,HSPA5,RPS16,RPL19,RPS17,SRP14,RPL14,RPS23
GO:BP	protein targeting to ER	GO:0045047	0.00852449	2.06933	108	595	15	17622	RPS29,RPLP1,RPS4X,RPL32,RPS6,RPL34,RPS28,RPS24,RPL37A,RPS16,RPL19,RPS17,SRP14,RPL14,RPS23
GO:BP	cellular developmental process	GO:0048869	0.0111649	1.95214	4306	595	193	17622	NME8,ANK3,KLF15,RTF1,CNFN,SETD3,AP3B1,CRB1,UNC45B,SULF1,SUZ12,WWOX,LDB1,RFX3,KRT8,ADAMTS9,FOXP1,BBS9,SPTBN4,YAP1,PARP11,RNF114,TAF7L,BDNF,ZFAT,NRXN3,KRTAP4-9,PPP3CB,RPS6,EPHA7,ATP11C,MEF2A,PDE3A,ADAM12,COL23A1,IL7,CTNNBIP1,S100A6,LINGO1,BRWD1,OPCML,TENM3,COL6A1,PACRG,EZH2,ACTG1,TESMIN,CHN1,APAF1,VHL,ITGA2,FLNA,CD53,PIP4K2A,HLF,COL19A1,TRIOBP,ABL2,CYFIP1,CHEK2,SGK1,TENT2,ARL6,QRICH1,POU3F2,MAST2,S…
GO:BP	cell part morphogenesis	GO:0032990	0.0113265	1.9459	672	595	46	17622	ANK3,FOXP1,SPTBN4,BDNF,NRXN3,PPP3CB,EPHA7,MEF2A,S100A6,LINGO1,CHN1,CYFIP1,SGK1,POU3F2,DOK6,PRKCQ,EXT1,DMD,PID1,WNT7A,CTNNB1,IMPACT,SRC,DOCK10,CFL1,EPB41L3,POU4F2,BRAF,NRP1,PTPRS,ROBO2,CDKL5,PAX6,SMO,ATOH1,SYT17,ARHGAP35,ZNF365,GFRA4,SEMA4D,RBFOX2,BRSK2,EPHA4,APBB2,GAB2,CTTN
GO:BP	plasma membrane bounded cell projection morphogenesis	GO:0120039	0.0116539	1.93353	652	595	45	17622	ANK3,FOXP1,SPTBN4,BDNF,NRXN3,PPP3CB,EPHA7,MEF2A,S100A6,LINGO1,CHN1,CYFIP1,SGK1,POU3F2,DOK6,PRKCQ,EXT1,DMD,WNT7A,CTNNB1,IMPACT,SRC,DOCK10,CFL1,EPB41L3,POU4F2,BRAF,NRP1,PTPRS,ROBO2,CDKL5,PAX6,SMO,ATOH1,SYT17,ARHGAP35,ZNF365,GFRA4,SEMA4D,RBFOX2,BRSK2,EPHA4,APBB2,GAB2,CTTN
GO:BP	cell projection morphogenesis	GO:0048858	0.0121262	1.91627	653	595	45	17622	ANK3,FOXP1,SPTBN4,BDNF,NRXN3,PPP3CB,EPHA7,MEF2A,S100A6,LINGO1,CHN1,CYFIP1,SGK1,POU3F2,DOK6,PRKCQ,EXT1,DMD,WNT7A,CTNNB1,IMPACT,SRC,DOCK10,CFL1,EPB41L3,POU4F2,BRAF,NRP1,PTPRS,ROBO2,CDKL5,PAX6,SMO,ATOH1,SYT17,ARHGAP35,ZNF365,GFRA4,SEMA4D,RBFOX2,BRSK2,EPHA4,APBB2,GAB2,CTTN
GO:BP	establishment of protein localization to endoplasmic reticulum	GO:0072599	0.013494	1.86986	112	595	15	17622	RPS29,RPLP1,RPS4X,RPL32,RPS6,RPL34,RPS28,RPS24,RPL37A,RPS16,RPL19,RPS17,SRP14,RPL14,RPS23
GO:BP	cerebellum development	GO:0021549	0.0145193	1.83805	99	595	14	17622	ATIC,LDB1,EZH2,TTBK2,WNT7A,PTN,HSPA5,PTPRS,SEZ6L,SMO,ZNF365,FOXC1,CNTN1,RORA
GO:BP	regulation of cell projection organization	GO:0031344	0.0159637	1.79687	660	595	45	17622	MNS1,BDNF,EPHA7,LINGO1,TENM3,EZH2,CHN1,ITGA2,ABL2,CYFIP1,POU3F2,SDK1,B2M,CNR1,DMD,SPOCK1,WNT7A,SRC,PTN,ICAM1,HSPA5,CFL1,CHODL,POU4F2,BRAF,ULK4,NRP1,PTPRS,ROBO2,CARMIL1,CDKL5,SYT17,ARHGAP35,CRTC1,NEGR1,ZNF365,CAPZB,CNTN1,SEMA4D,WDPCP,SERPINF1,DOCK11,BRSK2,EPHA4,CTTN
GO:BP	adherens junction assembly	GO:0034333	0.0217085	1.66337	89	595	13	17622	LDB1,DUSP22,ITGA2,PHLDB2,CTNNB1,SRC,NRP1,DLC1,DAPK3,EPB41L5,WDPCP,SLC9A1,CTTN
GO:BP	regulation of plasma membrane bounded cell projection organization	GO:0120035	0.0233569	1.63158	649	595	44	17622	MNS1,BDNF,EPHA7,LINGO1,TENM3,EZH2,CHN1,ABL2,CYFIP1,POU3F2,SDK1,B2M,CNR1,DMD,SPOCK1,WNT7A,SRC,PTN,ICAM1,HSPA5,CFL1,CHODL,POU4F2,BRAF,ULK4,NRP1,PTPRS,ROBO2,CARMIL1,CDKL5,SYT17,ARHGAP35,CRTC1,NEGR1,ZNF365,CAPZB,CNTN1,SEMA4D,WDPCP,SERPINF1,DOCK11,BRSK2,EPHA4,CTTN
GO:BP	cell adhesion	GO:0007155	0.0241731	1.61667	1387	595	77	17622	ANK3,AP3B1,LDB1,ADAMTS9,PLEKHA7,NRXN3,DUSP22,EPHA7,ADAM12,IL7,CD99L2,CYTH1,OPCML,TENM3,DST,COL6A1,SWAP70,ACTG1,ITGA2,FLNA,MEGF11,SCARF2,COL19A1,TRIOBP,ABL2,DLG2,ITGBL1,PARD3B,SDK1,PRKCQ,PHLDB2,DMD,SPOCK1,NRARP,CTNNB1,ACTB,TECTA,SRC,PTN,CD63,PARVG,ICAM1,PKN2,ANXA1,BRAF,NRP1,PTPRS,SASH3,ROBO2,TLN2,CARMIL1,ADAM19,DLC1,PPP2CA,COL6A3,PPFIA2,NEGR1,DAPK3,CNTN1,STXBP6,NRXN2,SEMA4D,MYL12A,EPB41L5,WDPCP,HS…
GO:BP	system development	GO:0048731	0.0273676	1.56276	4801	595	209	17622	ACSL3,ANK3,KLF15,CNNM4,ATIC,CNFN,PAXBP1,AP3B1,CRB1,UNC45B,HMGN1,SULF1,MAMLD1,WWOX,LDB1,RFX3,KRT8,ADAMTS9,FOXP1,SPTBN4,YAP1,LARGE1,TRIM71,BDNF,ZFAT,NRXN3,KRTAP4-9,PPP3CB,RPS6,TLE2,EPHA7,ATP11C,MEF2A,ADAM12,COL23A1,RNF38,IL7,CTNNBIP1,S100A6,LINGO1,AFF2,OPCML,TENM3,MACO1,COL6A1,IMMP2L,EZH2,MAX,SWAP70,NOX5,CHN1,APAF1,ITGA2,FLNA,MEGF11,PIP4K2A,HLF,PCYT1B,COL19A1,TRIOBP,ABL2,CYFIP1,SGK1,TENT2,ARL6,TTBK…
GO:BP	cytoskeleton organization	GO:0007010	0.0284087	1.54655	1323	595	74	17622	TNKS,RAE1,ANK3,KRT8,TMSB4X,FOXP1,SPTBN4,TMSB10,CNTLN,MEF2A,BRWD1,DST,TUBB,SWAP70,ACTG1,FRMD3,FOPNL,FLNA,MICAL3,TRIOBP,ABL2,CYFIP1,CHEK2,TTBK2,QRICH1,MAST2,PARD3B,ARHGEF18,CUL3,PHLDB2,DMD,IQSEC1,STARD9,CTNNB1,IQCG,ACTB,SRC,FCHSD2,FMN2,ANK2,PARVG,ICAM1,CFL1,EPB41L3,ANXA1,BRAF,ULK4,NRP1,DIAPH2,TLN2,MYH11,CARMIL1,PAX6,DLC1,PDGFA,ARHGAP35,CAPZB,DAPK3,BRCA2,EPB41L5,WDPCP,GAPDH,ATRX,SLC9A1,PCDH15,SORBS2…
GO:BP	biological adhesion	GO:0022610	0.0296314	1.52825	1395	595	77	17622	ANK3,AP3B1,LDB1,ADAMTS9,PLEKHA7,NRXN3,DUSP22,EPHA7,ADAM12,IL7,CD99L2,CYTH1,OPCML,TENM3,DST,COL6A1,SWAP70,ACTG1,ITGA2,FLNA,MEGF11,SCARF2,COL19A1,TRIOBP,ABL2,DLG2,ITGBL1,PARD3B,SDK1,PRKCQ,PHLDB2,DMD,SPOCK1,NRARP,CTNNB1,ACTB,TECTA,SRC,PTN,CD63,PARVG,ICAM1,PKN2,ANXA1,BRAF,NRP1,PTPRS,SASH3,ROBO2,TLN2,CARMIL1,ADAM19,DLC1,PPP2CA,COL6A3,PPFIA2,NEGR1,DAPK3,CNTN1,STXBP6,NRXN2,SEMA4D,MYL12A,EPB41L5,WDPCP,HS…
GO:BP	cell differentiation	GO:0030154	0.0300996	1.52144	4127	595	184	17622	NME8,ANK3,KLF15,RTF1,CNFN,SETD3,AP3B1,CRB1,UNC45B,SULF1,SUZ12,WWOX,LDB1,RFX3,KRT8,ADAMTS9,FOXP1,BBS9,SPTBN4,YAP1,PARP11,RNF114,TAF7L,BDNF,ZFAT,NRXN3,KRTAP4-9,PPP3CB,RPS6,EPHA7,ATP11C,MEF2A,PDE3A,ADAM12,COL23A1,IL7,CTNNBIP1,S100A6,LINGO1,OPCML,TENM3,COL6A1,PACRG,EZH2,ACTG1,TESMIN,CHN1,APAF1,VHL,ITGA2,FLNA,CD53,PIP4K2A,HLF,COL19A1,TRIOBP,ABL2,CYFIP1,SGK1,TENT2,ARL6,POU3F2,MAST2,SDK1,DOK6,SCGB3A1,B2…
GO:BP	translational initiation	GO:0006413	0.0324957	1.48817	198	595	20	17622	RPS29,PPP1R15B,RPLP1,RPS4X,RPL32,RPS6,RPL34,RPS28,DNAJC3,IMPACT,RPS24,RPL37A,RPS16,EIF2AK2,RPL19,RPS17,BANK1,RPL14,RPS23,HSPB1
GO:BP	multicellular organism development	GO:0007275	0.0327653	1.48459	5339	595	228	17622	NME8,ACSL3,ANK3,KLF15,RTF1,CNNM4,ATIC,CNFN,PAXBP1,AP3B1,CRB1,UNC45B,HMGN1,SULF1,MAMLD1,WWOX,LDB1,RFX3,KRT8,ADAMTS9,MNS1,FOXP1,RPS4X,AKIRIN2,SPTBN4,YAP1,RNF114,LARGE1,TRIM71,TAF7L,BDNF,ZFAT,NRXN3,DUSP22,KRTAP4-9,PPP3CB,RPS6,TLE2,EPHA7,ATP11C,MEF2A,ADAM12,COL23A1,RNF38,IL7,CTNNBIP1,S100A6,LINGO1,AFF2,OPCML,TENM3,MACO1,COL6A1,IMMP2L,EZH2,MAX,SWAP70,TESMIN,NOX5,CHN1,APAF1,ITGA2,FLNA,MEGF11,PIP4K2A,HL…
GO:BP	regulation of adherens junction organization	GO:1903391	0.0342016	1.46595	67	595	11	17622	LDB1,DUSP22,PHLDB2,IQSEC1,SRC,NRP1,DLC1,DAPK3,EPB41L5,WDPCP,SLC9A1
GO:BP	cell-substrate adhesion	GO:0031589	0.0345139	1.46201	340	595	28	17622	LDB1,ADAMTS9,DUSP22,ITGA2,FLNA,TRIOBP,ITGBL1,PHLDB2,DMD,SPOCK1,CTNNB1,TECTA,SRC,PTN,CD63,PARVG,BRAF,NRP1,CARMIL1,DLC1,PPFIA2,DAPK3,EPB41L5,WDPCP,HSD17B12,SLC9A1,LAMB1,CTTN
GO:BP	cell division	GO:0051301	0.0349572	1.45646	597	595	41	17622	SENP5,TNKS,RAE1,ANK3,CHMP6,CDC27,ANAPC10,TUBB,USP44,NOX5,CCND3,MICAL3,TRIOBP,CHEK2,POU3F2,NR3C1,PARD3B,CUL3,NEK1,WNT7A,PDS5B,FMN2,PTN,CFL1,PKN2,SOX5,PAX6,PDGFA,DRD3,STOX1,CDK14,RAB11FIP3,BRCA2,VEGFD,HTR2B,NEDD1,CSPP1,BRSK2,CHMP3,ANAPC7,KIF23
GO:BP	axonogenesis	GO:0007409	0.0359431	1.44438	456	595	34	17622	ANK3,FOXP1,SPTBN4,BDNF,NRXN3,PPP3CB,EPHA7,S100A6,LINGO1,CHN1,CYFIP1,POU3F2,DOK6,PRKCQ,EXT1,WNT7A,SRC,POU4F2,BRAF,NRP1,PTPRS,ROBO2,CDKL5,PAX6,SMO,ATOH1,ARHGAP35,GFRA4,SEMA4D,BRSK2,EPHA4,APBB2,GAB2,CTTN
GO:BP	focal adhesion assembly	GO:0048041	0.0363729	1.43922	80	595	12	17622	LDB1,DUSP22,ITGA2,PHLDB2,SRC,NRP1,DLC1,DAPK3,EPB41L5,WDPCP,SLC9A1,CTTN
GO:BP	cell-substrate adherens junction assembly	GO:0007045	0.0363729	1.43922	80	595	12	17622	LDB1,DUSP22,ITGA2,PHLDB2,SRC,NRP1,DLC1,DAPK3,EPB41L5,WDPCP,SLC9A1,CTTN
GO:BP	metencephalon development	GO:0022037	0.0404092	1.39352	108	595	14	17622	ATIC,LDB1,EZH2,TTBK2,WNT7A,PTN,HSPA5,PTPRS,SEZ6L,SMO,ZNF365,FOXC1,CNTN1,RORA
GO:BP	regulation of cell morphogenesis	GO:0022604	0.0414115	1.38288	479	595	35	17622	BDNF,EPHA7,LINGO1,BRWD1,CHN1,FLNA,TRIOBP,CYFIP1,QRICH1,POU3F2,ARHGEF18,WNT7A,SRC,PTN,ICAM1,CFL1,EPB41L3,POU4F2,ANXA1,BRAF,NRP1,PTPRS,ROBO2,CARMIL1,CDKL5,DLC1,SYT17,ARHGAP35,CAPZB,DAPK3,SEMA4D,WDPCP,BRSK2,EPHA4,CTTN
GO:CC	cell-substrate junction	GO:0030055	1.03e-07	6.98827	411	617	41	18745	RPS29,RPLP1,RPS4X,TLE2,PROCR,CD99L2,DST,ACTG1,ITGA2,FLNA,SCARF2,TRIOBP,CYFIP1,ITGBL1,B2M,PHLDB2,DMD,CTNNB1,ACTB,PRKAR2A,PARVG,ICAM1,RPL37A,HSPA5,CFL1,RPS16,ANXA1,NRP1,TLN2,DLC1,RPL19,AKAP12,RPS17,ARHGAP24,EPB41L5,SLC9A1,SORBS2,HSPB1,PPIB,KIF23,CTTN
GO:CC	adherens junction	GO:0005912	1.32e-07	6.87887	537	617	48	18745	RPS29,CRB1,RPLP1,RPS4X,SPTBN4,PLEKHA7,TLE2,PROCR,CD99L2,CYTH1,DST,ACTG1,ITGA2,FLNA,SCARF2,TRIOBP,CYFIP1,ITGBL1,PARD3B,B2M,PHLDB2,FRMD4A,CTNNB1,ACTB,PRKAR2A,PARVG,ICAM1,RPL37A,HSPA5,CFL1,RPS16,ANXA1,NRP1,TLN2,DLC1,RPL19,AKAP12,STXBP6,RPS17,ARHGAP24,EPB41L5,SLC9A1,SORBS2,HSPB1,POF1B,PPIB,KIF23,CTTN
GO:CC	intracellular part	GO:0044424	1.75e-07	6.75576	14362	617	533	18745	SENP5,RFK,TNKS,RAE1,NME8,ACSL3,ANK3,GMPR,KLF15,RAB11FIP2,SYPL1,MUC3A,RTF1,PASD1,MT2A,GDE1,ATIC,ANKRD28,GRIA3,MAP3K10,CNFN,GLRX3,SETD3,PAXBP1,GSTA4,RPS29,TEAD1,ATXN2L,TNFAIP8,UBXN11,BRD4,AP3B1,WDR27,SERHL2,DCP2,GALNT17,UNC45B,HMGN1,SULF1,SCML1,MAMLD1,PPP1R15B,SUZ12,WWOX,FIP1L1,LDB1,RFX3,KRT8,PHKB,ADAMTS9,TMSB4X,ARSG,MNS1,FOXP1,BBS9,GLDC,RPLP1,NGB,DNA2,KLHL15,RPS4X,AKIRIN2,SPTBN4,TMSB10,YAP1,LDHAL6…
GO:CC	focal adhesion	GO:0005925	2.13e-07	6.67163	404	617	40	18745	RPS29,RPLP1,RPS4X,TLE2,PROCR,CD99L2,DST,ACTG1,ITGA2,FLNA,SCARF2,TRIOBP,CYFIP1,ITGBL1,B2M,PHLDB2,CTNNB1,ACTB,PRKAR2A,PARVG,ICAM1,RPL37A,HSPA5,CFL1,RPS16,ANXA1,NRP1,TLN2,DLC1,RPL19,AKAP12,RPS17,ARHGAP24,EPB41L5,SLC9A1,SORBS2,HSPB1,PPIB,KIF23,CTTN
GO:CC	cell-substrate adherens junction	GO:0005924	2.65e-07	6.57671	407	617	40	18745	RPS29,RPLP1,RPS4X,TLE2,PROCR,CD99L2,DST,ACTG1,ITGA2,FLNA,SCARF2,TRIOBP,CYFIP1,ITGBL1,B2M,PHLDB2,CTNNB1,ACTB,PRKAR2A,PARVG,ICAM1,RPL37A,HSPA5,CFL1,RPS16,ANXA1,NRP1,TLN2,DLC1,RPL19,AKAP12,RPS17,ARHGAP24,EPB41L5,SLC9A1,SORBS2,HSPB1,PPIB,KIF23,CTTN
GO:CC	anchoring junction	GO:0070161	3.32e-07	6.47878	552	617	48	18745	RPS29,CRB1,RPLP1,RPS4X,SPTBN4,PLEKHA7,TLE2,PROCR,CD99L2,CYTH1,DST,ACTG1,ITGA2,FLNA,SCARF2,TRIOBP,CYFIP1,ITGBL1,PARD3B,B2M,PHLDB2,FRMD4A,CTNNB1,ACTB,PRKAR2A,PARVG,ICAM1,RPL37A,HSPA5,CFL1,RPS16,ANXA1,NRP1,TLN2,DLC1,RPL19,AKAP12,STXBP6,RPS17,ARHGAP24,EPB41L5,SLC9A1,SORBS2,HSPB1,POF1B,PPIB,KIF23,CTTN
GO:CC	cytoplasm	GO:0005737	5.66e-07	6.2473	11436	617	446	18745	RFK,TNKS,RAE1,NME8,ACSL3,ANK3,GMPR,RAB11FIP2,SYPL1,MUC3A,MT2A,GDE1,ATIC,ANKRD28,GRIA3,MAP3K10,CNFN,GLRX3,PAXBP1,GSTA4,RPS29,ATXN2L,TNFAIP8,UBXN11,BRD4,AP3B1,SERHL2,DCP2,GALNT17,UNC45B,HMGN1,SULF1,MAMLD1,PPP1R15B,WWOX,KRT8,PHKB,ADAMTS9,TMSB4X,ARSG,MNS1,FOXP1,BBS9,GLDC,RPLP1,NGB,DNA2,RPS4X,SPTBN4,TMSB10,YAP1,LDHAL6B,PIGU,RNF114,LARGE1,RNF217,RPL32,RNF14,CHMP6,CASC4,TRIM71,TAF7L,BDNF,MSRA,CHCHD2,MTR…
GO:CC	intracellular	GO:0005622	2.38e-06	5.62341	14724	617	539	18745	SENP5,RFK,TNKS,RAE1,NME8,ACSL3,ANK3,GMPR,KLF15,RAB11FIP2,SYPL1,MUC3A,RTF1,PASD1,MT2A,GDE1,ATIC,ANKRD28,GRIA3,MAP3K10,CNFN,GLRX3,SETD3,PAXBP1,GSTA4,RPS29,TEAD1,ATXN2L,TNFAIP8,UBXN11,BRD4,AP3B1,WDR27,SERHL2,DCP2,GALNT17,UNC45B,HMGN1,SULF1,SCML1,MAMLD1,PPP1R15B,SUZ12,WWOX,FIP1L1,LDB1,RFX3,KRT8,PHKB,ADAMTS9,TMSB4X,ARSG,MNS1,FOXP1,BBS9,GLDC,RPLP1,NGB,DNA2,KLHL15,RPS4X,AKIRIN2,SPTBN4,TMSB10,YAP1,LDHAL6…
GO:CC	organelle	GO:0043226	9.2e-06	5.03637	13419	617	500	18745	SENP5,TNKS,RAE1,NME8,ACSL3,ANK3,KLF15,RAB11FIP2,SYPL1,MUC3A,RTF1,PASD1,ENPP6,MT2A,GDE1,ATIC,ANKRD28,GRIA3,GLRX3,SETD3,PAXBP1,RPS29,TEAD1,ATXN2L,TNFAIP8,UBXN11,BRD4,AP3B1,WDR27,SERHL2,DCP2,LOXHD1,GALNT17,HMGN1,SULF1,SCML1,MAMLD1,PPP1R15B,SUZ12,WWOX,FIP1L1,LDB1,RFX3,KRT8,ADAMTS9,TMSB4X,ARSG,MNS1,FOXP1,BBS9,GLDC,RPLP1,NGB,DNA2,KLHL15,RPS4X,AKIRIN2,SPTBN4,TMSB10,YAP1,LDHAL6B,PARP11,PIGU,RNF114,LARGE1…
GO:CC	cytoplasmic part	GO:0044444	5.26e-05	4.27884	9606	617	379	18745	RFK,TNKS,NME8,ACSL3,ANK3,GMPR,RAB11FIP2,SYPL1,MUC3A,MT2A,GDE1,ATIC,ANKRD28,GRIA3,GLRX3,PAXBP1,GSTA4,RPS29,ATXN2L,BRD4,AP3B1,SERHL2,DCP2,GALNT17,UNC45B,SULF1,MAMLD1,PPP1R15B,WWOX,KRT8,PHKB,ADAMTS9,TMSB4X,ARSG,MNS1,BBS9,GLDC,RPLP1,NGB,DNA2,RPS4X,SPTBN4,YAP1,LDHAL6B,PIGU,RNF114,LARGE1,RNF217,RPL32,RNF14,CHMP6,CASC4,TRIM71,BDNF,MSRA,CHCHD2,SPPL2A,PTPN18,ZFAT,RIMKLA,DNAH9,PLEKHA7,TBC1D16,RPL26L1,DUSP2…
GO:CC	cell junction	GO:0030054	0.000134734	3.87052	1280	617	76	18745	ANK3,GRIA3,RPS29,CRB1,DCP2,KRT8,RPLP1,RPS4X,SPTBN4,PLEKHA7,TLE2,PROCR,CD99L2,CYTH1,DST,ACTG1,ITGA2,FLNA,CD53,SCARF2,TRIOBP,CYFIP1,DLG2,ITGBL1,PARD3B,PRRT1,SDK1,ARHGEF18,B2M,PHLDB2,FRMD4A,DMD,CTNNB1,ACTB,PRKAR2A,ANK2,PARVG,ICAM1,RPL37A,HSPA5,CFL1,RPS16,FGFR4,PKN2,EPB41L3,ANXA1,NRP1,PTPRS,TLN2,DLC1,SLC17A5,RPL19,TJP3,AKAP12,STXBP6,RPS17,ARHGAP24,EPB41L5,PATJ,OLFM3,HTR2B,C8ORF37,SLC9A1,SGSM3,IGSF9B,…
GO:CC	organelle part	GO:0044422	0.000150049	3.82377	9434	617	371	18745	SENP5,TNKS,RAE1,NME8,ACSL3,ANK3,RAB11FIP2,SYPL1,MUC3A,RTF1,PASD1,GDE1,ANKRD28,GRIA3,GLRX3,SETD3,RPS29,TEAD1,ATXN2L,TNFAIP8,BRD4,AP3B1,WDR27,DCP2,LOXHD1,GALNT17,HMGN1,SULF1,MAMLD1,SUZ12,WWOX,FIP1L1,LDB1,RFX3,KRT8,TMSB4X,ARSG,MNS1,FOXP1,BBS9,GLDC,RPLP1,DNA2,RPS4X,AKIRIN2,SPTBN4,YAP1,LDHAL6B,PARP11,PIGU,LARGE1,RPL32,CHMP6,TAF7L,BDNF,MSRA,CHCHD2,SPPL2A,PTPN18,DNAH9,PLEKHA7,RPL26L1,HDGF,DUSP22,KRTAP4-…
GO:CC	intracellular organelle	GO:0043229	0.000282052	3.54967	12602	617	469	18745	SENP5,TNKS,RAE1,NME8,ACSL3,ANK3,KLF15,RAB11FIP2,SYPL1,MUC3A,RTF1,PASD1,MT2A,GDE1,ANKRD28,GRIA3,GLRX3,SETD3,PAXBP1,RPS29,TEAD1,ATXN2L,TNFAIP8,UBXN11,BRD4,AP3B1,WDR27,SERHL2,DCP2,GALNT17,HMGN1,SULF1,SCML1,MAMLD1,PPP1R15B,SUZ12,WWOX,FIP1L1,LDB1,RFX3,KRT8,ADAMTS9,TMSB4X,ARSG,MNS1,FOXP1,BBS9,GLDC,RPLP1,NGB,DNA2,KLHL15,RPS4X,AKIRIN2,SPTBN4,TMSB10,YAP1,LDHAL6B,PARP11,PIGU,RNF114,LARGE1,RPL32,RNF14,CHMP6…
GO:CC	cytosolic ribosome	GO:0022626	0.000653178	3.18497	119	617	16	18745	RPS29,RPLP1,RPS4X,RPL32,RPL26L1,RPS6,RPL34,RPS28,RPS24,RPL37A,RPS16,EIF2AK2,RPL19,RPS17,RPL14,RPS23
GO:CC	cytosol	GO:0005829	0.000848932	3.07113	5061	617	218	18745	RFK,TNKS,ANK3,GMPR,MT2A,ATIC,ANKRD28,GLRX3,PAXBP1,GSTA4,RPS29,ATXN2L,BRD4,DCP2,UNC45B,WWOX,KRT8,PHKB,TMSB4X,BBS9,RPLP1,NGB,RPS4X,SPTBN4,YAP1,RNF114,RNF217,RPL32,RNF14,CHMP6,MSRA,PTPN18,ZFAT,RIMKLA,PLEKHA7,TBC1D16,RPL26L1,DUSP22,KRTAP4-9,PPP3CB,OXSR1,RPS6,C16ORF89,CNTLN,CDC27,MEF2A,ANAPC10,RIN2,PDE3A,CXXC5,NFU1,CTNNBIP1,FTL,S100A6,BRWD1,EXOC6,CYTH1,DST,FLYWCH1,SNX16,AGBL2,RHOT2,PACRG,SENP8,ACTG1,A…
GO:CC	intracellular organelle part	GO:0044446	0.00123055	2.9099	9164	617	357	18745	SENP5,TNKS,RAE1,NME8,ACSL3,RAB11FIP2,SYPL1,MUC3A,RTF1,PASD1,GDE1,ANKRD28,GRIA3,SETD3,RPS29,TEAD1,ATXN2L,TNFAIP8,BRD4,AP3B1,WDR27,DCP2,GALNT17,HMGN1,SULF1,MAMLD1,SUZ12,WWOX,FIP1L1,LDB1,RFX3,KRT8,TMSB4X,ARSG,MNS1,FOXP1,BBS9,GLDC,RPLP1,DNA2,RPS4X,AKIRIN2,SPTBN4,YAP1,LDHAL6B,PARP11,PIGU,LARGE1,RPL32,CHMP6,TAF7L,BDNF,MSRA,CHCHD2,SPPL2A,PTPN18,DNAH9,PLEKHA7,RPL26L1,HDGF,DUSP22,KRTAP4-9,PPP3CB,RPS6,CNTL…
GO:CC	membrane-bounded organelle	GO:0043227	0.00126698	2.89723	12352	617	458	18745	SENP5,TNKS,RAE1,NME8,ACSL3,ANK3,KLF15,RAB11FIP2,SYPL1,MUC3A,RTF1,PASD1,ENPP6,MT2A,GDE1,ATIC,ANKRD28,GRIA3,GLRX3,SETD3,PAXBP1,RPS29,TEAD1,ATXN2L,TNFAIP8,BRD4,AP3B1,WDR27,SERHL2,DCP2,GALNT17,HMGN1,SULF1,SCML1,MAMLD1,PPP1R15B,SUZ12,WWOX,FIP1L1,LDB1,RFX3,KRT8,ADAMTS9,TMSB4X,ARSG,MNS1,FOXP1,BBS9,GLDC,NGB,DNA2,KLHL15,RPS4X,AKIRIN2,SPTBN4,YAP1,LDHAL6B,PARP11,PIGU,RNF114,LARGE1,RNF14,CHMP6,CASC4,TAF7L,BD…
GO:CC	intracellular non-membrane-bounded organelle	GO:0043232	0.00629071	2.2013	4223	617	183	18745	SENP5,TNKS,RAE1,NME8,ACSL3,ANK3,RTF1,GLRX3,SETD3,RPS29,ATXN2L,UBXN11,BRD4,DCP2,HMGN1,MAMLD1,SUZ12,LDB1,RFX3,KRT8,TMSB4X,MNS1,BBS9,RPLP1,DNA2,RPS4X,SPTBN4,TMSB10,RPL32,TRIM71,MSRA,DNAH9,PLEKHA7,RPL26L1,DUSP22,KRTAP4-9,PPP3CB,RPS6,CNTLN,CDC27,MEF2A,PROCR,BRWD1,DST,TUBB,AGBL2,EZH2,MAX,SWAP70,ACTG1,FRMD3,BORCS5,HELB,PMF1-BGLAP,FOPNL,FLNA,MICAL3,TRIOBP,ABL2,CHEK2,ARL6,TTBK2,MRPS12,MAST2,NR3C1,RPL34,AR…
GO:CC	non-membrane-bounded organelle	GO:0043228	0.00696382	2.15715	4230	617	183	18745	SENP5,TNKS,RAE1,NME8,ACSL3,ANK3,RTF1,GLRX3,SETD3,RPS29,ATXN2L,UBXN11,BRD4,DCP2,HMGN1,MAMLD1,SUZ12,LDB1,RFX3,KRT8,TMSB4X,MNS1,BBS9,RPLP1,DNA2,RPS4X,SPTBN4,TMSB10,RPL32,TRIM71,MSRA,DNAH9,PLEKHA7,RPL26L1,DUSP22,KRTAP4-9,PPP3CB,RPS6,CNTLN,CDC27,MEF2A,PROCR,BRWD1,DST,TUBB,AGBL2,EZH2,MAX,SWAP70,ACTG1,FRMD3,BORCS5,HELB,PMF1-BGLAP,FOPNL,FLNA,MICAL3,TRIOBP,ABL2,CHEK2,ARL6,TTBK2,MRPS12,MAST2,NR3C1,RPL34,AR…
GO:CC	cytoskeleton	GO:0005856	0.0252016	1.59857	2165	617	103	18745	TNKS,RAE1,NME8,ANK3,UBXN11,MAMLD1,KRT8,TMSB4X,MNS1,BBS9,SPTBN4,TMSB10,MSRA,DNAH9,PLEKHA7,DUSP22,KRTAP4-9,CNTLN,CDC27,PROCR,DST,TUBB,AGBL2,SWAP70,ACTG1,FRMD3,BORCS5,FOPNL,FLNA,MICAL3,TRIOBP,ABL2,ARL6,TTBK2,MAST2,NR3C1,ARHGEF18,CUL3,NEK1,PRKCQ,PHLDB2,FRMD4A,DMD,STARD9,CTNNB1,IQCG,ACTB,CFAP300,SRC,DNAH10,PRKAR2A,FMN2,ANK2,TMEM201,WDR19,RAB22A,PARVG,CFL1,PKN2,EPB41L3,ANXA1,NRP1,TLN2,TBCA,MYH11,CARMIL…
GO:CC	actin filament	GO:0005884	0.0430752	1.36577	101	617	12	18745	DUSP22,ACTG1,FLNA,SRC,FMN2,ANXA1,CARMIL1,CAPZB,DAPK3,MYO18B,POF1B,CTTN
GO:CC	cell leading edge	GO:0031252	0.0454939	1.34205	395	617	28	18745	LDB1,SLC39A14,DUSP22,S100A6,DST,SWAP70,CYFIP1,PHLDB2,DMD,CTNNB1,ARHGEF4,SRC,RAB22A,CFL1,PKN2,EPB41L3,ROBO2,TLN2,CARMIL1,CDKL5,DLC1,CAPZB,MYO1D,EPB41L5,SLC9A1,SORBS2,APBB2,CTTN
KEGG	Focal adhesion	KEGG:04510	0.00387401	2.41184	197	250	19	7332	COL6A1,ACTG1,ITGA2,FLNA,CCND3,CTNNB1,ACTB,SRC,PARVG,BRAF,TLN2,PDGFA,COL6A3,ARHGAP35,MYL12A,VEGFD,COL1A2,COL4A1,LAMB1
KEGG	Ribosome	KEGG:03010	0.0043981	2.35673	149	250	16	7332	RPS29,RPLP1,RPS4X,RPL32,RPL26L1,RPS6,MRPS12,RPL34,RPS28,RPS24,RPL37A,RPS16,RPL19,RPS17,RPL14,RPS23
REAC	Axon guidance	REAC:R-HSA-422475	1.05e-05	4.97931	548	378	47	10478	ANK3,RPS29,LDB1,RPLP1,RPS4X,SPTBN4,RPL32,RPL26L1,PPP3CB,RPS6,EPHA7,COL6A1,ACTG1,ITGA2,ABL2,SCN11A,DOK6,RPL34,RPS28,PRKCQ,ACTB,SRC,PRKAR2A,RPS24,ANK2,RPL37A,CFL1,RPS16,NRP1,ROBO2,MYH11,RPL19,COL6A3,ARHGAP35,GFRA4,CNTN1,RPS17,SEMA4D,MYL12A,RPL14,RPS23,COL4A1,EPHA4,GAB2,AP2A2,ARHGAP39,LAMB1
REAC	Viral mRNA Translation	REAC:R-HSA-192823	5.1e-05	4.29258	90	378	16	10478	RPS29,RPLP1,RPS4X,RPL32,RPL26L1,RPS6,RPL34,RPS28,DNAJC3,RPS24,RPL37A,RPS16,RPL19,RPS17,RPL14,RPS23
REAC	Peptide chain elongation	REAC:R-HSA-156902	0.000304772	3.51603	90	378	15	10478	RPS29,RPLP1,RPS4X,RPL32,RPL26L1,RPS6,RPL34,RPS28,RPS24,RPL37A,RPS16,RPL19,RPS17,RPL14,RPS23
REAC	Selenocysteine synthesis	REAC:R-HSA-2408557	0.000542292	3.26577	94	378	15	10478	RPS29,RPLP1,RPS4X,RPL32,RPL26L1,RPS6,RPL34,RPS28,RPS24,RPL37A,RPS16,RPL19,RPS17,RPL14,RPS23
REAC	Eukaryotic Translation Termination	REAC:R-HSA-72764	0.000542292	3.26577	94	378	15	10478	RPS29,RPLP1,RPS4X,RPL32,RPL26L1,RPS6,RPL34,RPS28,RPS24,RPL37A,RPS16,RPL19,RPS17,RPL14,RPS23
REAC	Eukaryotic Translation Elongation	REAC:R-HSA-156842	0.000542292	3.26577	94	378	15	10478	RPS29,RPLP1,RPS4X,RPL32,RPL26L1,RPS6,RPL34,RPS28,RPS24,RPL37A,RPS16,RPL19,RPS17,RPL14,RPS23
REAC	Nonsense Mediated Decay (NMD) independent of the Exon Junction Complex (EJC)	REAC:R-HSA-975956	0.000714633	3.14592	96	378	15	10478	RPS29,RPLP1,RPS4X,RPL32,RPL26L1,RPS6,RPL34,RPS28,RPS24,RPL37A,RPS16,RPL19,RPS17,RPL14,RPS23
REAC	SRP-dependent cotranslational protein targeting to membrane	REAC:R-HSA-1799339	0.00123336	2.90891	113	378	16	10478	RPS29,RPLP1,RPS4X,RPL32,RPL26L1,RPS6,RPL34,RPS28,RPS24,RPL37A,RPS16,RPL19,RPS17,SRP14,RPL14,RPS23
REAC	Formation of a pool of free 40S subunits	REAC:R-HSA-72689	0.00156442	2.80565	102	378	15	10478	RPS29,RPLP1,RPS4X,RPL32,RPL26L1,RPS6,RPL34,RPS28,RPS24,RPL37A,RPS16,RPL19,RPS17,RPL14,RPS23
REAC	Signaling by ROBO receptors	REAC:R-HSA-376176	0.00156954	2.80423	217	378	23	10478	RPS29,LDB1,RPLP1,RPS4X,RPL32,RPL26L1,PPP3CB,RPS6,ABL2,RPL34,RPS28,SRC,PRKAR2A,RPS24,RPL37A,RPS16,NRP1,ROBO2,RPL19,RPS17,RPL14,RPS23,ARHGAP39
REAC	Nonsense Mediated Decay (NMD) enhanced by the Exon Junction Complex (EJC)	REAC:R-HSA-975957	0.00175136	2.75663	116	378	16	10478	RPS29,RPLP1,RPS4X,RPL32,RPL26L1,RPS6,RPL34,RPS28,RPS24,RPL37A,RPS16,RPL19,PPP2CA,RPS17,RPL14,RPS23
REAC	Nonsense-Mediated Decay (NMD)	REAC:R-HSA-927802	0.00175136	2.75663	116	378	16	10478	RPS29,RPLP1,RPS4X,RPL32,RPL26L1,RPS6,RPL34,RPS28,RPS24,RPL37A,RPS16,RPL19,PPP2CA,RPS17,RPL14,RPS23
REAC	Selenoamino acid metabolism	REAC:R-HSA-2408522	0.00196307	2.70706	117	378	16	10478	RPS29,RPLP1,RPS4X,RPL32,RPL26L1,RPS6,RPL34,RPS28,RPS24,RPL37A,RPS16,RPL19,RPS17,NNMT,RPL14,RPS23
REAC	Influenza Viral RNA Transcription and Replication	REAC:R-HSA-168273	0.00227288	2.64342	132	378	17	10478	RAE1,RPS29,RPLP1,RPS4X,RPL32,RPL26L1,RPS6,RPL34,RPS28,DNAJC3,RPS24,RPL37A,RPS16,RPL19,RPS17,RPL14,RPS23
REAC	Influenza Infection	REAC:R-HSA-168254	0.00398551	2.39952	152	378	18	10478	RAE1,RPS29,RPLP1,RPS4X,RPL32,RPL26L1,RPS6,RPL34,RPS28,DNAJC3,RPS24,RPL37A,RPS16,EIF2AK2,RPL19,RPS17,RPL14,RPS23
REAC	L13a-mediated translational silencing of Ceruloplasmin expression	REAC:R-HSA-156827	0.00506856	2.29512	112	378	15	10478	RPS29,RPLP1,RPS4X,RPL32,RPL26L1,RPS6,RPL34,RPS28,RPS24,RPL37A,RPS16,RPL19,RPS17,RPL14,RPS23
REAC	Influenza Life Cycle	REAC:R-HSA-168255	0.00556878	2.25424	141	378	17	10478	RAE1,RPS29,RPLP1,RPS4X,RPL32,RPL26L1,RPS6,RPL34,RPS28,DNAJC3,RPS24,RPL37A,RPS16,RPL19,RPS17,RPL14,RPS23
REAC	GTP hydrolysis and joining of the 60S ribosomal subunit	REAC:R-HSA-72706	0.00565558	2.24752	113	378	15	10478	RPS29,RPLP1,RPS4X,RPL32,RPL26L1,RPS6,RPL34,RPS28,RPS24,RPL37A,RPS16,RPL19,RPS17,RPL14,RPS23
REAC	Cap-dependent Translation Initiation	REAC:R-HSA-72737	0.0117474	1.93006	120	378	15	10478	RPS29,RPLP1,RPS4X,RPL32,RPL26L1,RPS6,RPL34,RPS28,RPS24,RPL37A,RPS16,RPL19,RPS17,RPL14,RPS23
REAC	Eukaryotic Translation Initiation	REAC:R-HSA-72613	0.0117474	1.93006	120	378	15	10478	RPS29,RPLP1,RPS4X,RPL32,RPL26L1,RPS6,RPL34,RPS28,RPS24,RPL37A,RPS16,RPL19,RPS17,RPL14,RPS23
WP	Cytoplasmic Ribosomal Proteins	WP:WP477	0.000237632	3.62409	89	222	14	6376	RPS29,RPLP1,RPS4X,RPL32,RPS6,RPL34,RPS28,RPS24,RPL37A,RPS16,RPL19,RPS17,RPL14,RPS23
WP	Mesodermal Commitment Pathway	WP:WP2857	0.0344377	1.46297	154	222	15	6376	TEAD1,YAP1,TRIM71,ELP4,TBX1,EXT1,TOX,PAX6,ADAM19,PPP2CA,PLCH1,CRTC1,FOXC1,EPB41L5,ASCC3
TF	Factor: ETF; motif: GVGGMGG; match class: 1	TF:M00695_1	0.00681081	2.1668	7012	660	288	19909	RFK,TNKS,RAE1,ACSL3,GMPR,KLF15,SYPL1,RTF1,CNNM4,ATIC,ANKRD28,MAP3K10,GLRX3,PLXDC2,SETD3,PAXBP1,TEAD1,ATXN2L,DCP2,GALNT17,HMGN1,SKIDA1,SCUBE3,SUZ12,FIP1L1,LDB1,RFX3,PHKB,ADAMTS9,TMSB4X,KCND3,ARSG,FOXP1,GLDC,AKIRIN2,SPTBN4,YAP1,LARGE1,RNF217,CHMP6,TRIM71,BDNF,KIAA0100,SPPL2A,SLC39A14,PTPN18,RIMKLA,PLEKHA7,TBC1D16,RPL26L1,HDGF,DUSP22,PPP3CB,OXSR1,MEF2A,ZNF732,PDE3A,CXXC5,ADAM12,COL23A1,RNF38,PNKD,ZD…
TF	Factor: Egr-1; motif: GCGCATGCG; match class: 1	TF:M04869_1	0.00746157	2.12717	10261	660	397	19909	SENP5,RFK,RAE1,NME8,ACSL3,GMPR,KLF15,RAB11FIP2,SYPL1,RTF1,PASD1,CNNM4,MT2A,GDE1,ATIC,ANKRD28,GRIA3,SETD3,PAXBP1,GSTA4,RPS29,TEAD1,ATXN2L,UBXN11,AP3B1,WDR27,SERHL2,DCP2,GALNT17,HMGN1,SKIDA1,SCML1,SCUBE3,PPP1R15B,SUZ12,WWOX,FIP1L1,LDB1,RFX3,PHKB,TMSB4X,KCND3,ARSG,MNS1,FOXP1,BBS9,GLDC,RPLP1,NGB,DNA2,AKIRIN2,SPTBN4,YAP1,RNASEK,TBC1D19,PARP11,PIGU,RNF114,LARGE1,RNF217,RPL32,RNF14,CHMP6,CASC4,TRIM71,BD…
TF	Factor: KROX; motif: CCCGCCCCCRCCCC; match class: 1	TF:M00982_1	0.0110049	1.95841	3513	660	161	19909	RFK,RAE1,GMPR,KLF15,RTF1,PASD1,CNNM4,GRIA3,MAP3K10,CNFN,SETD3,TEAD1,SERHL2,HMGN1,SCML1,SCUBE3,PHKB,ARSG,BBS9,GLDC,NGB,SPTBN4,YAP1,PIGU,LARGE1,BDNF,KIAA0100,SPPL2A,SLC39A14,PLEKHA7,HDGF,DUSP22,PPP3CB,EPHA7,MEF2A,PDE3A,COL23A1,RNF38,ARMC7,BRWD1,CD99L2,EXOC6,SENP8,MAX,ACTG1,JPH3,CHN1,PMF1-BGLAP,UBE2E2,CHST15,PLA2G12A,HLF,SCML2,SCARF2,TRIOBP,GALNT13,UBE2E3,CHEK2,KCTD2,MUC5B,POU3F2,PRRT1,SDK1,DOK6,SCG…
TF	Factor: BTEB1; motif: GGGGGCGGGGCNGSGGGNGS; match class: 1	TF:M09723_1	0.0476653	1.3218	5960	660	246	19909	RFK,RAE1,ACSL3,KLF15,RAB11FIP2,SYPL1,MUC3A,RTF1,PASD1,CNNM4,GRIA3,MAP3K10,CNFN,GLRX3,SETD3,TEAD1,ATXN2L,UBXN11,SERHL2,HMGN1,SCML1,PPP1R15B,FIP1L1,RFX3,KRT8,PHKB,ADAMTS9,KCND3,ARSG,MNS1,BBS9,NGB,SPTBN4,TMSB10,PIGU,RNF114,LARGE1,RNF217,CASC4,BDNF,MSRA,SPPL2A,SLC39A14,ZFAT,DNAH9,PLEKHA7,RPL26L1,HDGF,DUSP22,MMEL1,PPP3CB,OXSR1,TLE2,EPHA7,MEF2A,PDE3A,CXXC5,COL23A1,RIT1,RNF38,BRWD1,CD99L2,EXOC6,MACO1,CO…
MIRNA	hsa-miR-138-2-3p	MIRNA:hsa-miR-138-2-3p	0.0288759	1.53946	90	566	13	14829	RAB11FIP2,KLHL15,YAP1,RNF217,SPPL2A,TENM3,SLC35E4,ANKRD42,ITGBL1,ZFP14,LCOR,ZBTB18,RBM41
CORUM	Ribosome, cytoplasmic	CORUM:306	0.00322209	2.49186	80	155	14	3620	RPS29,RPLP1,RPS4X,RPL32,RPS6,RPL34,RPS28,RPS24,RPL37A,RPS16,RPL19,RPS17,RPL14,RPS23
CORUM	40S ribosomal subunit, cytoplasmic	CORUM:338	0.0205798	1.68656	31	155	8	3620	RPS29,RPS4X,RPS6,RPS28,RPS24,RPS16,RPS17,RPS23
CORUM	40S ribosomal subunit, cytoplasmic	CORUM:305	0.0336627	1.47285	33	155	8	3620	RPS29,RPS4X,RPS6,RPS28,RPS24,RPS16,RPS17,RPS23
CORUM	ICAT-AR-beta-catenin complex	CORUM:6206	0.0493917	1.30635	3	155	3	3620	CTNNBIP1,CTNNB1,AR
